# Supplementary material for: Molding process and properties of polyimide-fiber-fabric-reinforced polyether ether ketone composites
Source: publisher site journal article supplement (doi:10.1515/polyeng-2022-0064), 2022-08-05
Supplement: Supplementary file 1 [file j_polyeng-2022-0064_suppl.docx]

**Supplementary Material**

Molding process and properties of polyimide-fiber-fabric-reinforced polyether ether ketone composites

Jindong Zhang et al.

DOI 10.1515/polyeng-2022-0064


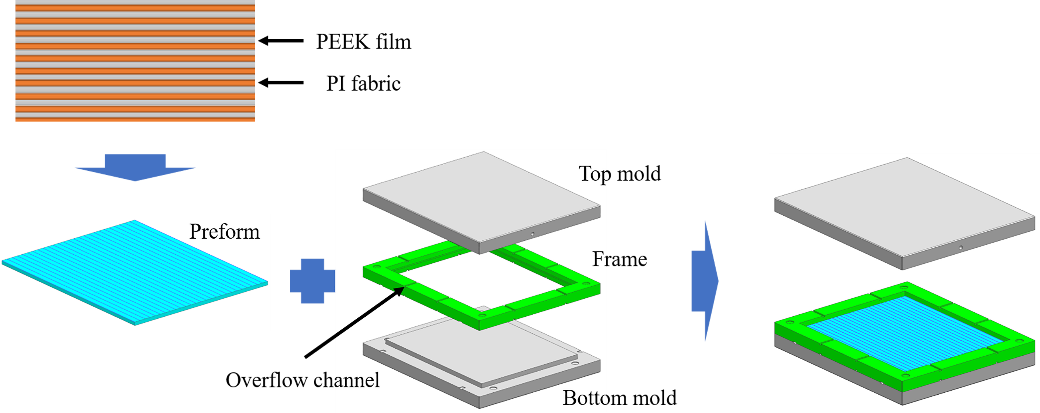


**Supplementary Figure S1:** A schematic diagram for molding process of the composite laminate.






















**Supplementary Figure S2:** Tensile stress-strain curves of (a) PI/PEEK-1 prepared at 350 °C/30 min, (b) PI/PEEK-2 prepared at 350 °C/30 min, (c) PI/PEEK-3 composites prepared at 350 °C/30 min, (d) PI/PEEK-3 composites prepared at 360 °C/30 min, (e) PI/PEEK-3 composites prepared at 370 °C/30 min, (f) PI/PEEK-3 composites prepared at 380 °C/30 min, (g) PI/PEEK-3 composites prepared at 350 °C/10 min, (h) PI/PEEK-3 composites prepared at 350 °C/60 min.
